# Supplementary material for: Relationship between β-Carotene Accumulation and Geranylgeranyl Pyrophosphate Synthase in Different Species of Dunaliella
Source: MDPI journal article supplement (doi:10.3390/plants11010027), 2021-12-22
Supplement: s1 [file s1]

# Relationship between $\beta$ -carotene accumulation and Geranylgeranyl Pyrophosphate Synthase in Different Species of *Dunaliella*

XU Lu<sup>1</sup>, Fan Gao<sup>1</sup>, FENG Jia<sup>1</sup>, LV Junping<sup>1</sup>, LIU Qi<sup>1</sup>, Fangru Nan<sup>1</sup>, LIU Xudong<sup>1</sup>, XIE Shulian<sup>1,\*</sup>

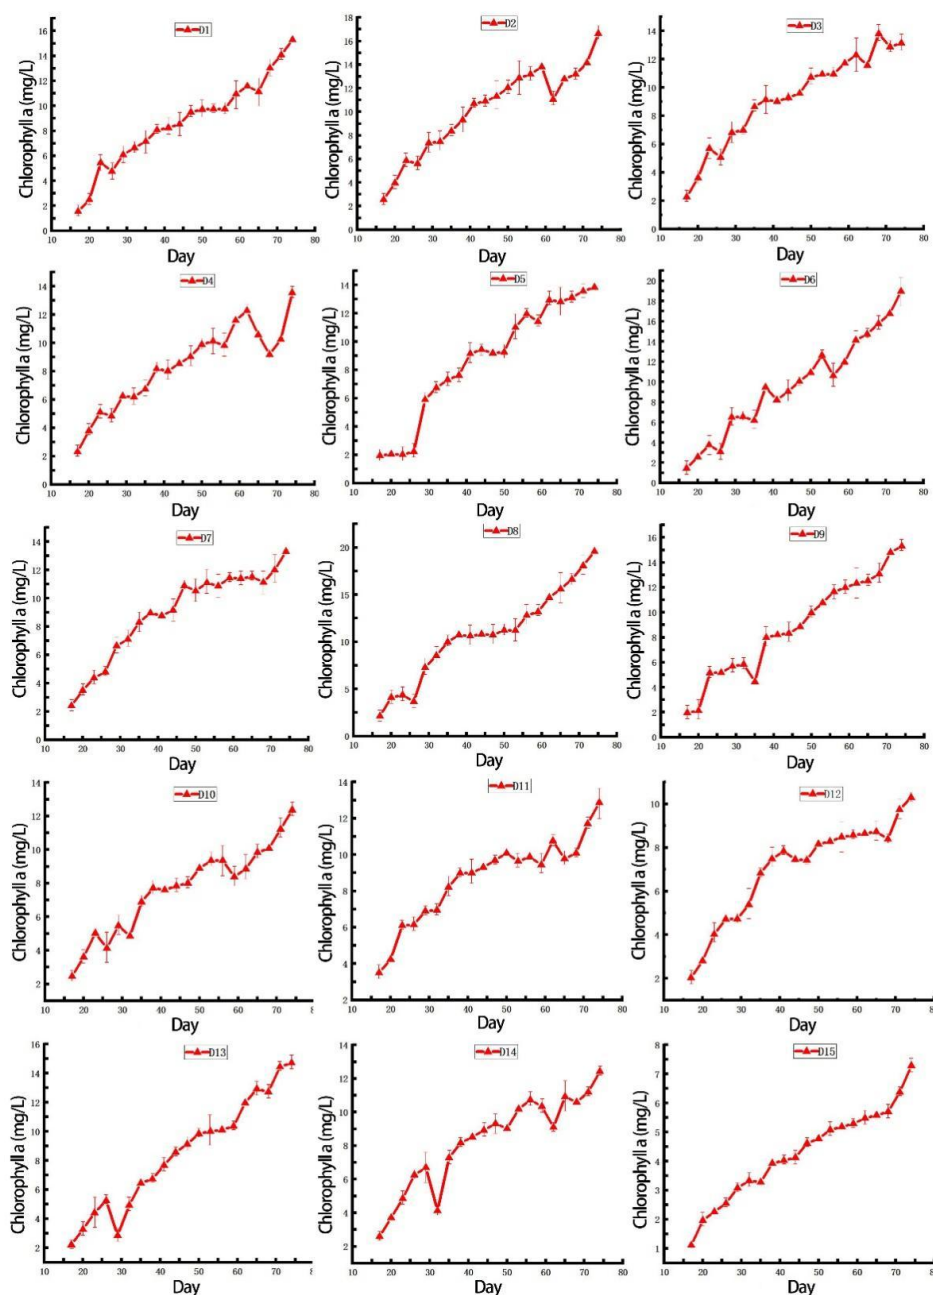

Supplementary Figure S1 Changes in chlorophyll a content in the 15 *Dunaliella* species

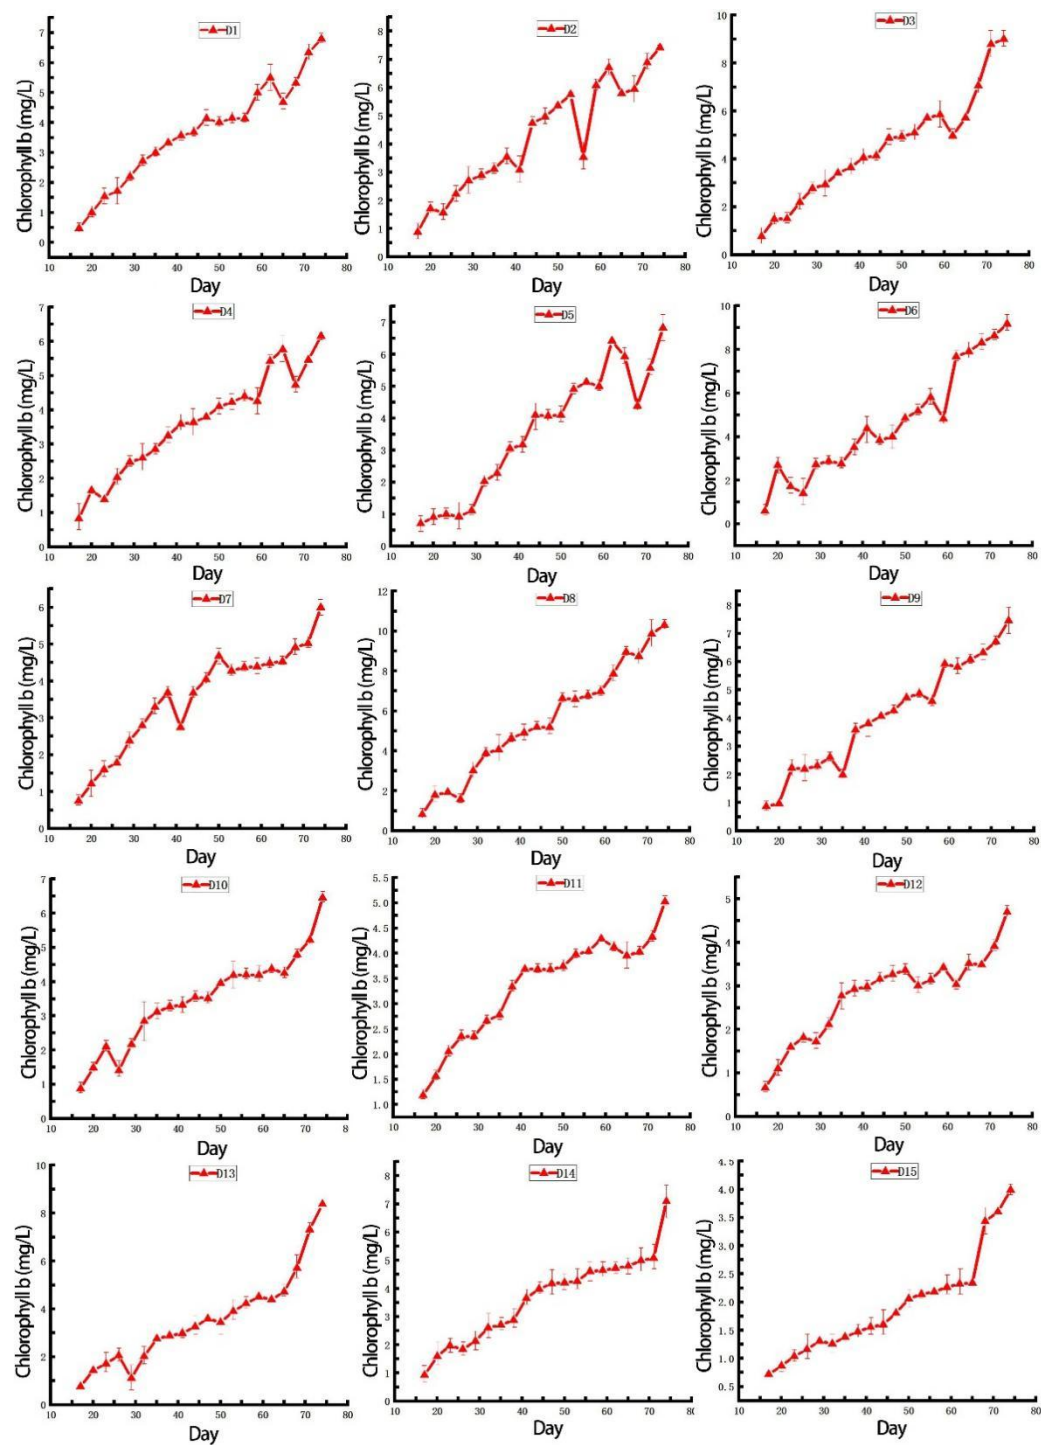

Supplementary Figure S2 Changes in chlorophyll *b* content in the 15 *Dunaliella* species

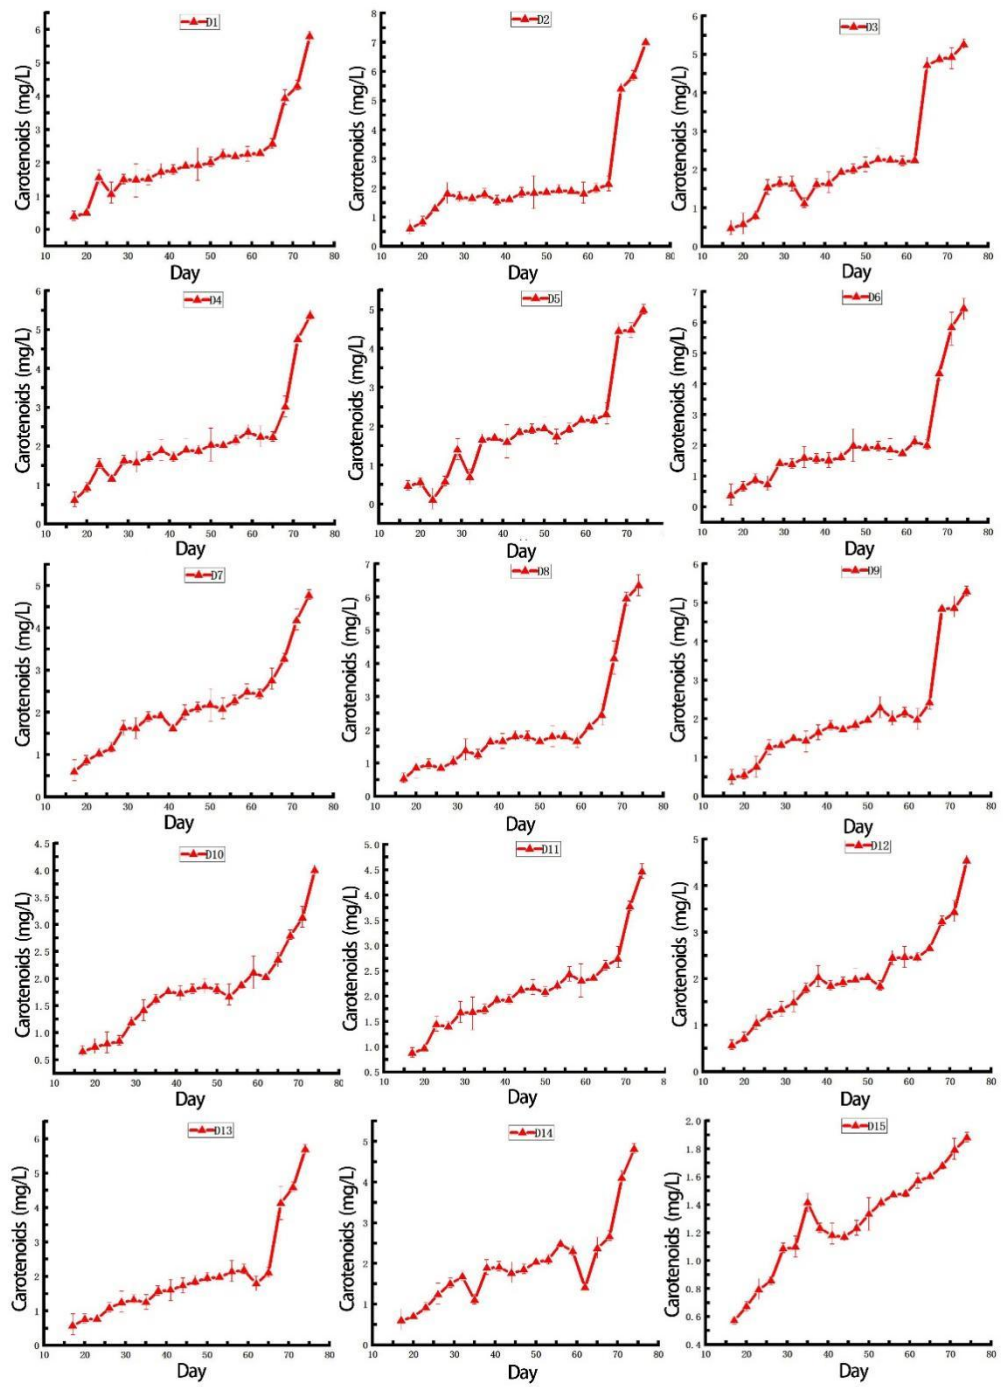

Supplementary Figure S3 Changes in carotenoid content in the 15 *Dunaliella* species

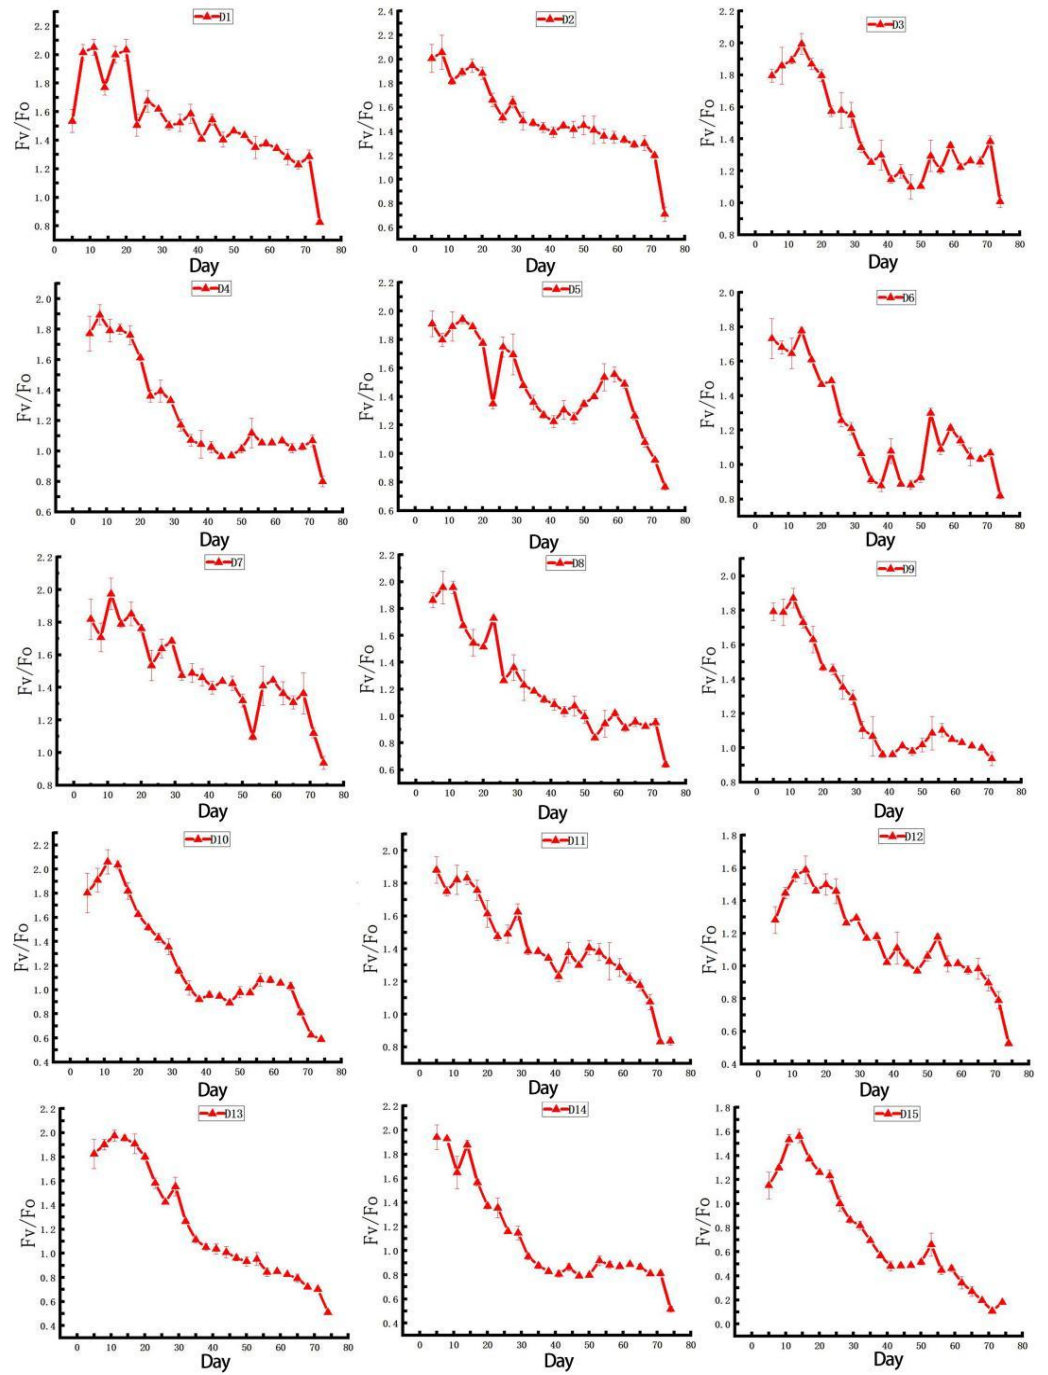

**Supplementary Figure S4** Changes in the Fv/Fo ratio in the 15 *Dunaliella* species

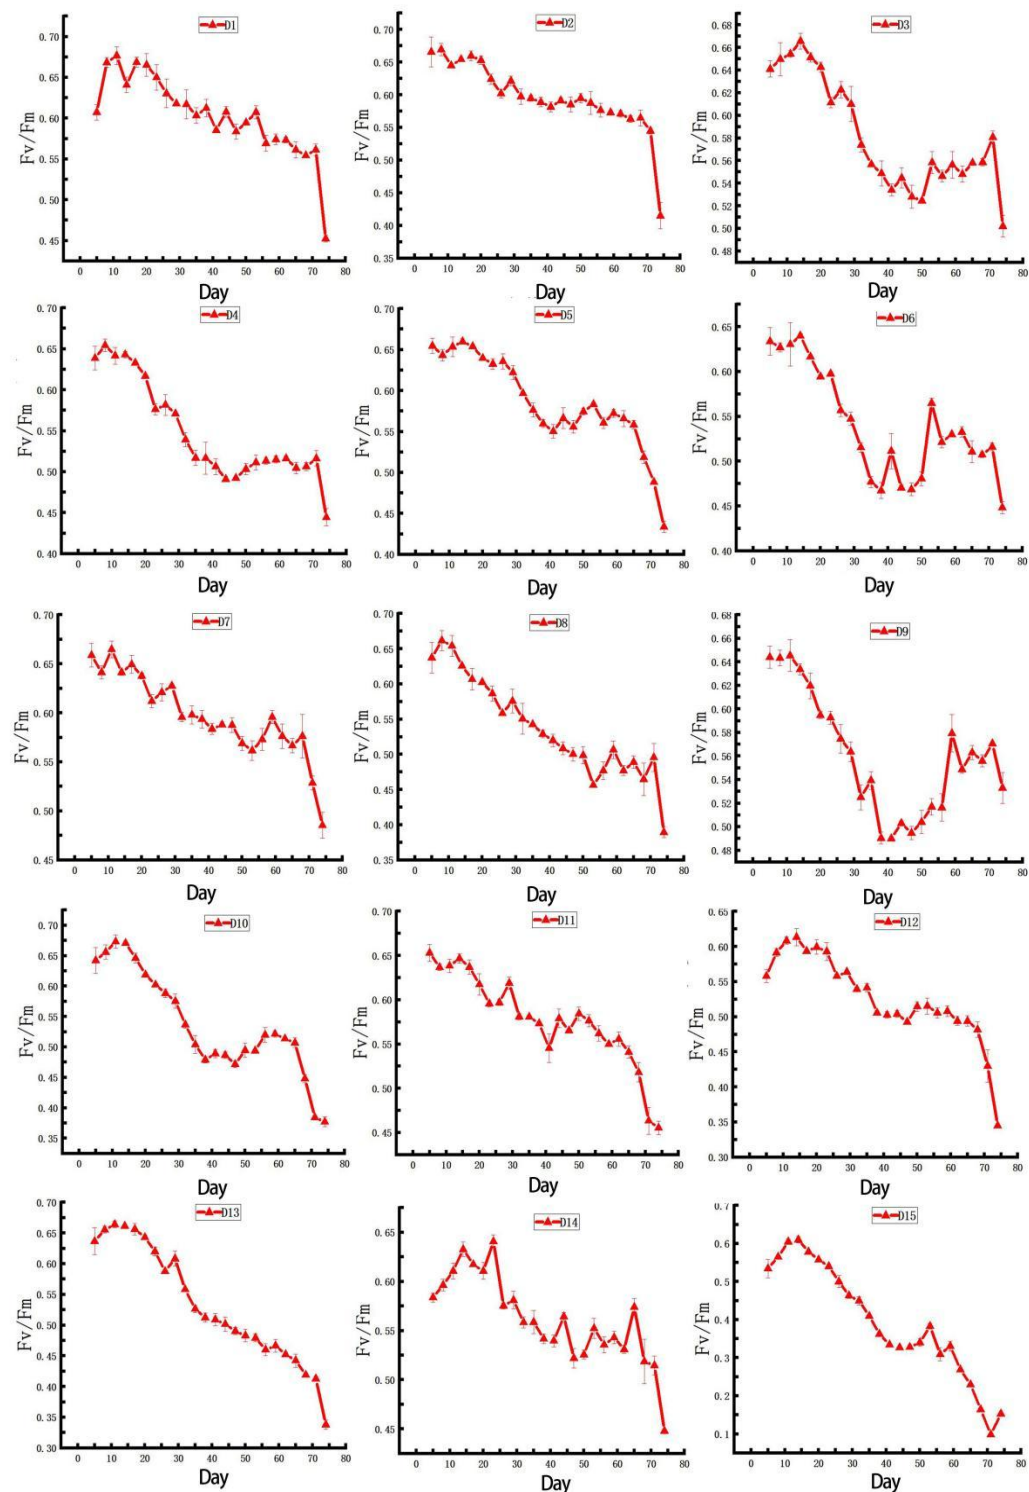

Supplementary Figure S5 Changes in the Fv/Fm ratio in the 15 *Dunaliella* species
